# Supplementary figures and images for: Exercise training has greater effects on insulin sensitivity in daughters of patients with type 2 diabetes than in women with no family history of diabetes
Source: PubMed Central journal article supplement — Diabetologia. 2008 Jul 29;51(10):1912–9. doi: 10.1007/s00125-008-1097-6 (PMC2584356; doi:10.1007/s00125-008-1097-6), 2008-07-29

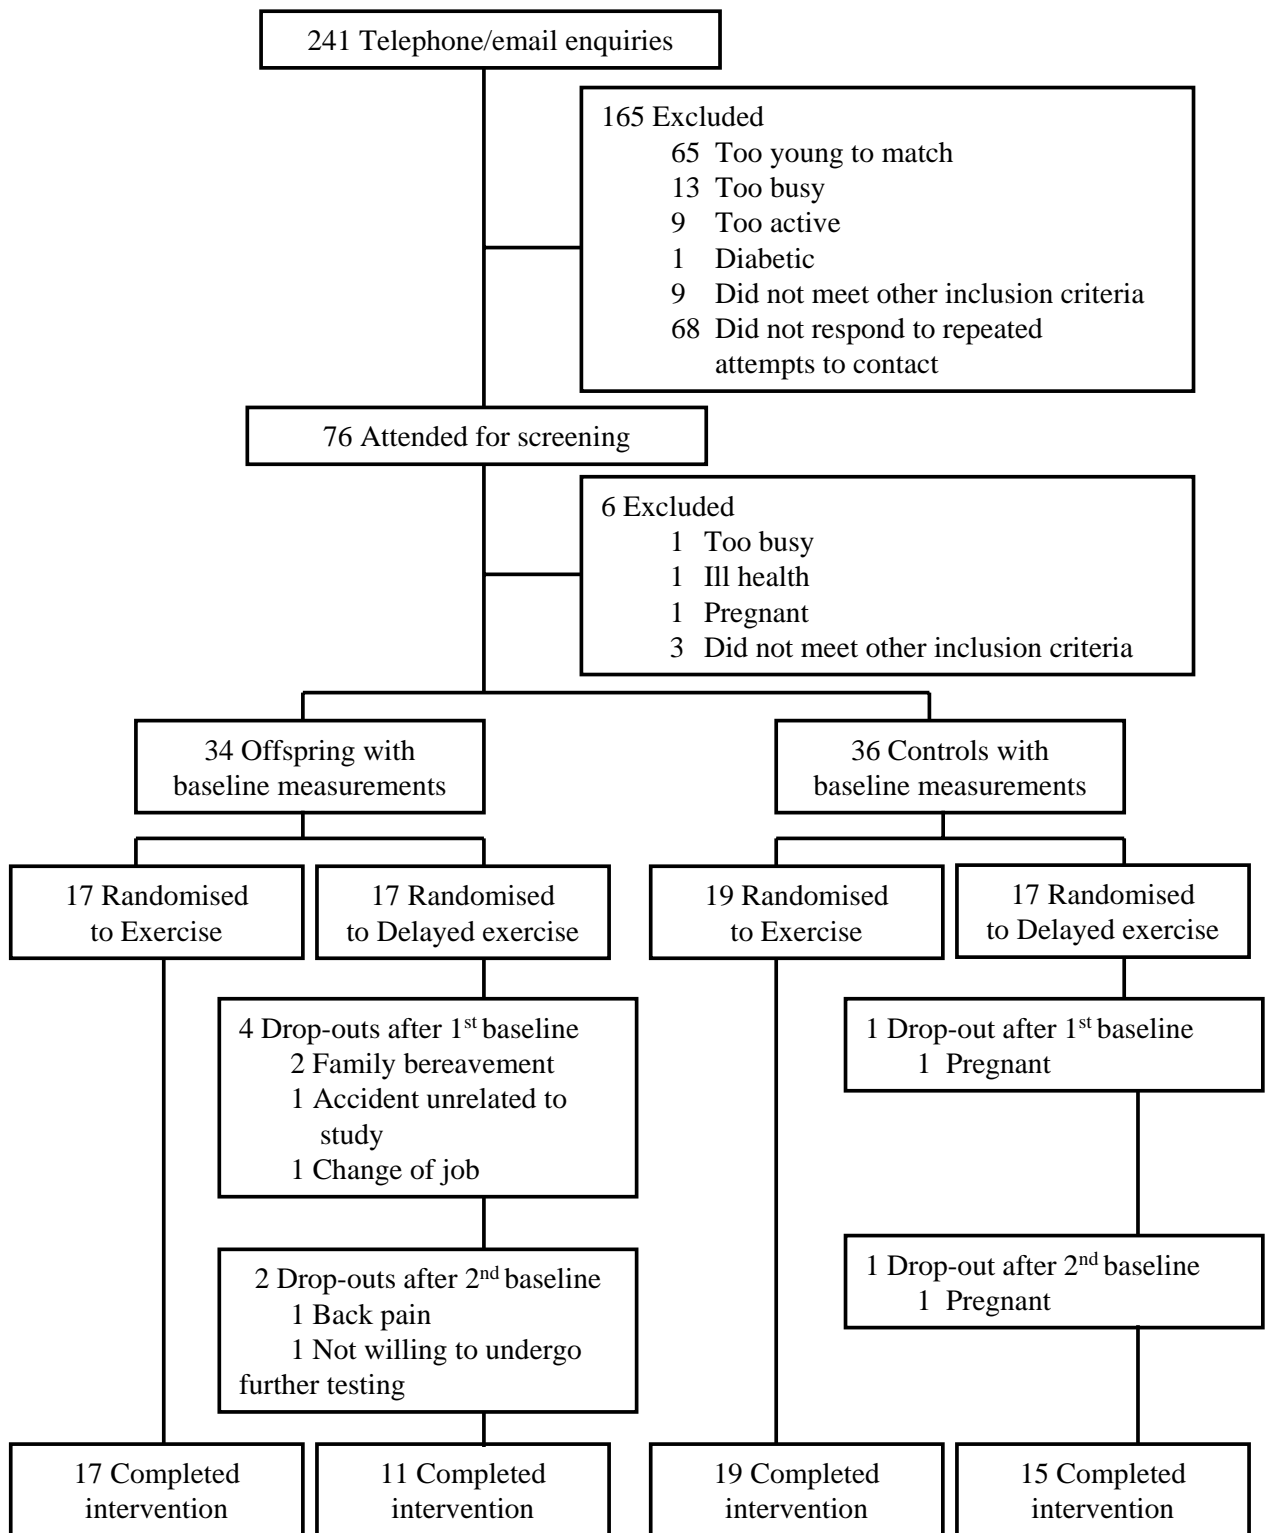

Supplement: 125_2008_1097_MOESM1_ESM.pdf [file 125_2008_1097_MOESM1_ESM.pdf]
